# Supplementary material
Source: PubMed Central journal article supplement (PMC3848335)

## SUPPORTING INFORMATION

### Structure Activity Relationships and Molecular Modeling of Sphingosine Kinase Inhibitors

Dong Jae Baek,<sup>†,a</sup> Neil MacRitchie,<sup>‡,a</sup> Nahoun G. Anthony<sup>‡</sup>, Simon P. Mackay<sup>‡</sup>, Susan Pyne,<sup>‡</sup> Nigel J. Pyne,<sup>‡</sup> and Robert Bittman<sup>\*</sup>

<sup>†</sup>Department of Chemistry and Biochemistry, Queens College, The City University of New York, Flushing, New York 11367-1597, United States

<sup>‡</sup>Cell Biology and Drug Discovery & Design Groups, Strathclyde Institute of Pharmacy and Biomedical Sciences, University of Strathclyde, Glasgow G4 0RE, United Kingdom

<sup>a</sup>These authors contributed equally.

#### *Table of Contents*

|                                                              | Page  |
|--------------------------------------------------------------|-------|
| Sphingosine kinase activity assays .....                     | S2-S3 |
| Inhibitor <b>RB-035</b> docked into the SK1 active site..... | S4    |

### **Sphingosine kinase activity assays.**

For SK2 activity assays, sphingosine (Sph) was complexed with fatty acid free bovine serum albumin (final concentration, 0.2 mg/mL) in reaction buffer 1 containing 20 mM Tris (pH 7.4), 1 mM EDTA, 1 mM Na<sub>3</sub>VO<sub>4</sub>, 40 mM β-glycerophosphate, 1 mM NaF, 0.007% (v/v) β-mercaptoethanol, 20% (v/v) glycerol, 10 μg/mL aprotinin, 10 μg/mL soybean trypsin inhibitor, 1 mM PMSF, 0.5 mM 4-deoxy pyridoxine, and 400 mM KCl. Inhibition of SK2 activity was determined by incubating 37 ng of purified SK2 for 30 min at 30 °C in the presence of 10 μM Sph, 250 μM of [γ-<sup>32</sup>P]ATP (specific activity, 4.4×10<sup>4</sup> cpm/nmol) in 10 mM MgCl<sub>2</sub>, and varying concentrations of the inhibitors dissolved in DMSO or control (5% v/v DMSO). For SK1 activity assays, Sph was solubilized in Triton X-100 (final concentration, 0.063% w/v) and combined with buffer 1 without KCl. SK1 activity was determined by incubating 30 μg of recombinant SK1 in lysates from HEK 293 cells for 30 min at 30 °C, in the presence of 3 μM Sph, 250 μM of [γ-<sup>32</sup>P]ATP in 10 mM MgCl<sub>2</sub> with or without inhibitor dissolved in DMSO or control (5% v/v DMSO). SK1 and SK2 reactions were terminated by the addition of 500 μL of 1-butanol and were then mixed with 1 mL of 2 M KCl. The organic phase containing [<sup>32</sup>P]-S1P was extracted by washing twice with 1 mL of 2 M KCl before quantification by Cerenkov counting.

Compounds bearing hydroxyl groups were assessed for their ability to act as substrates for SK1 and SK2. Of these compounds, only **RB-037**, **RB-041**, and **RB-043** were weak substrates for SK2 (Fig. S1).

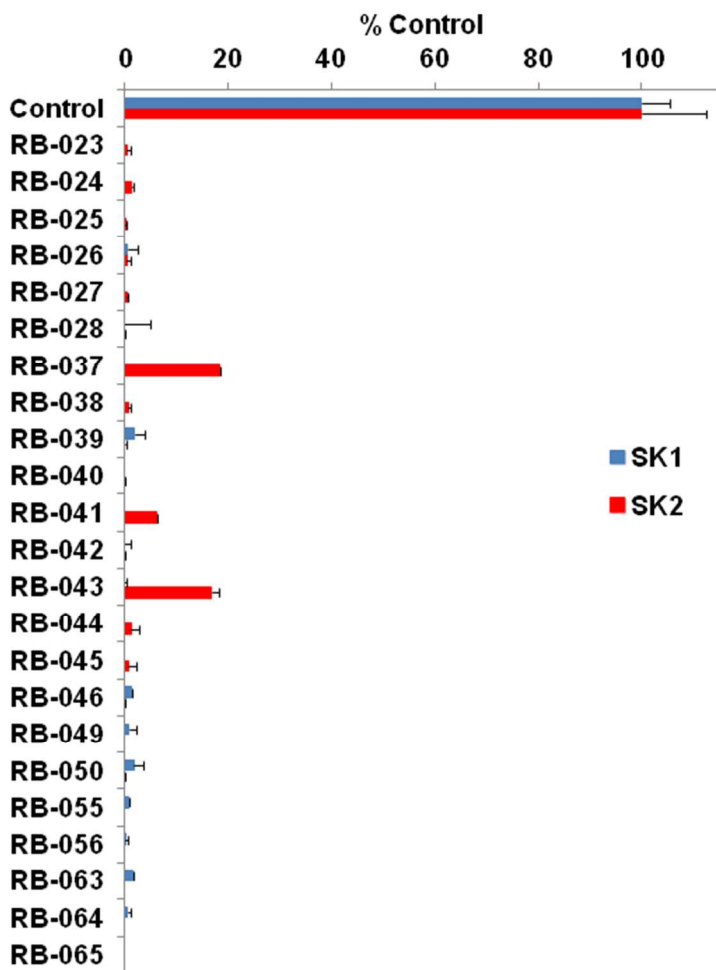

**Fig. S1.** Evaluation of compounds as putative substrates of SK1 and SK2. SK1 and SK2 activity was measured using 50  $\mu$ M compound and 250  $\mu$ M ATP in the absence of Sph (n = 3 for each compound). The results are expressed as % of control  $\pm$  S.D. Control = activity using Sph alone (3  $\mu$ M for SK1 and 10  $\mu$ M for SK2) and is represented as 100%, against which each compound alone is compared.

As shown in Fig. S2, **RB-035** is predicted to utilize its carbonyl group to form hydrogen bonds with the hydroxyl group of S168 and water. Therefore, **RB-035** exhibits a different binding mode than **RB-005** to explain its inhibitory activity.

**Fig. S2.** Docking of **RB-035** into the active site of SK1.

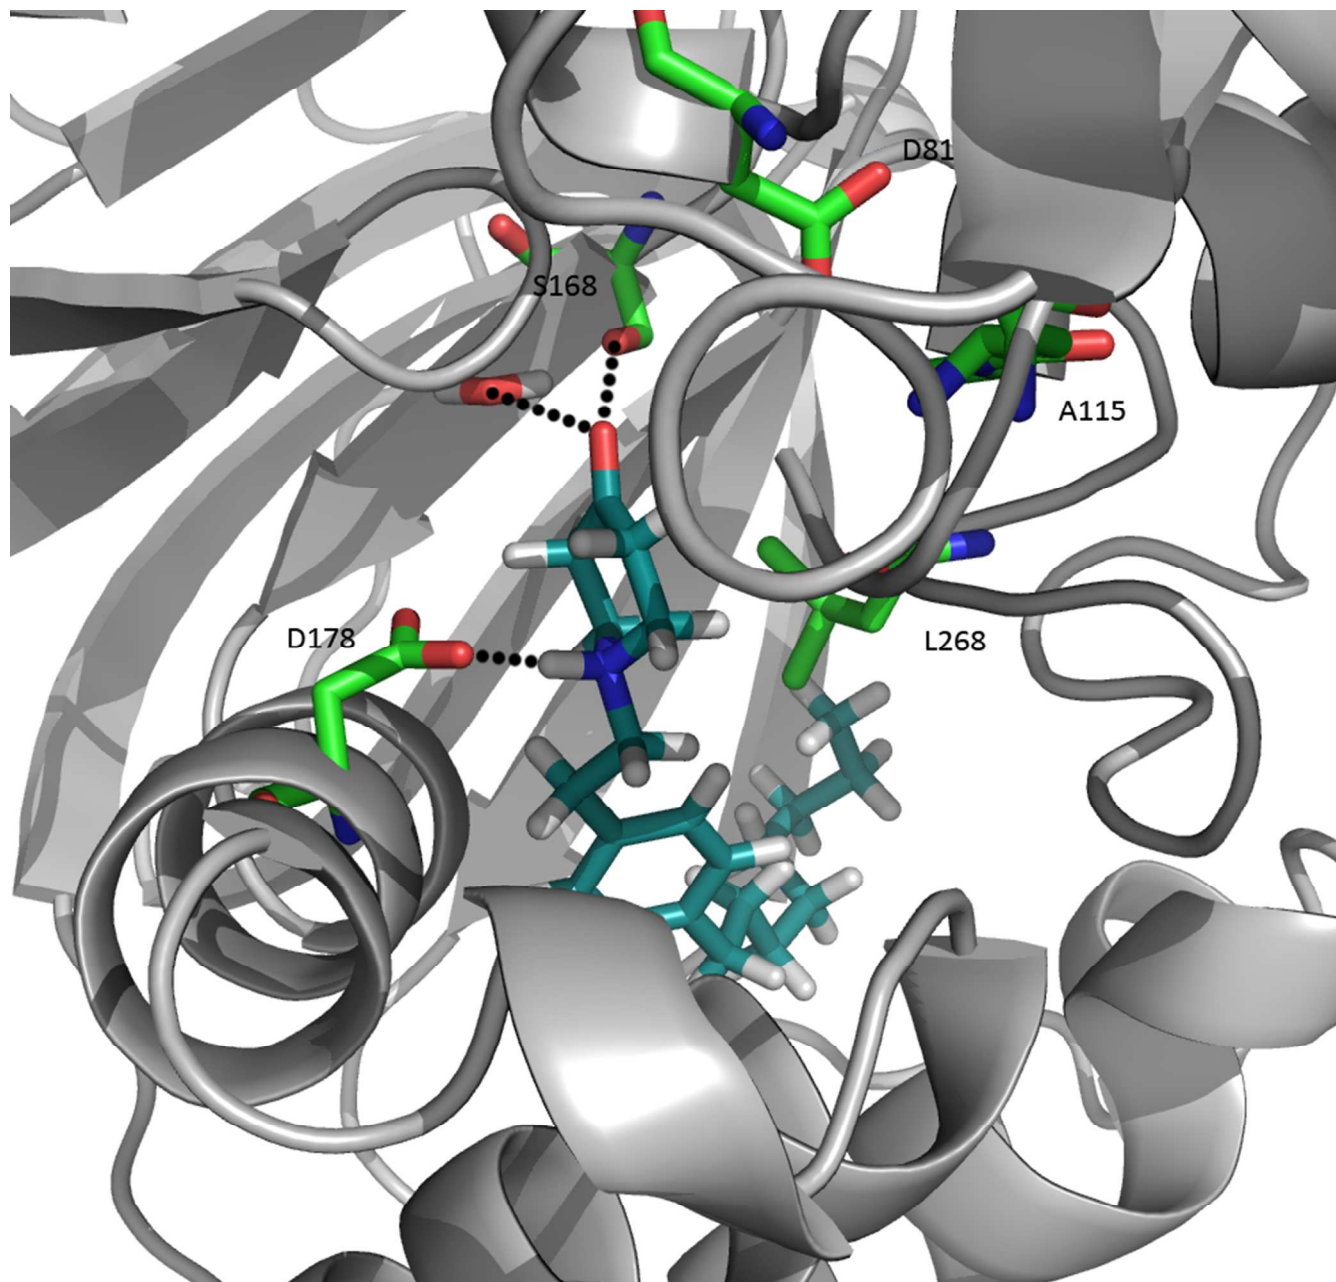

Supplement: jm401399c_si_001.pdf [file jm401399c_si_001.pdf]
